# Supplementary material
Source: publisher site journal article supplement (https://www.dovepress.com/get_supplementary_file.php?f=287806.docx)
Supplement: Supplementary file 1 [file get_supplementary_file.php]

Supplementary Materials

A Carrier-free Ursolic Acid/Methotrexate Nanodelivery System with Folate Receptor-Targeted for Synergetic Anticancer Therapy

Jin-Shuai Lan1,2,*, Yan-Hong Qin2,*, Li Liu2, Rui-Feng Zeng2, Yang Yang3, Kai Wang3, Yue Ding1,2 , Tong Zhang1,2 and Rodney J. Y. Ho5

**Table S1.** Entrapment efficiency (EE %) and loading efficiency (LE %) of UA-MTX NPs

|  | **UA** | **MTX** |
| --- | --- | --- |
| **EE%** | 96.86% | 91.69% |
| **LE%** | 80.79% | 19.21% |


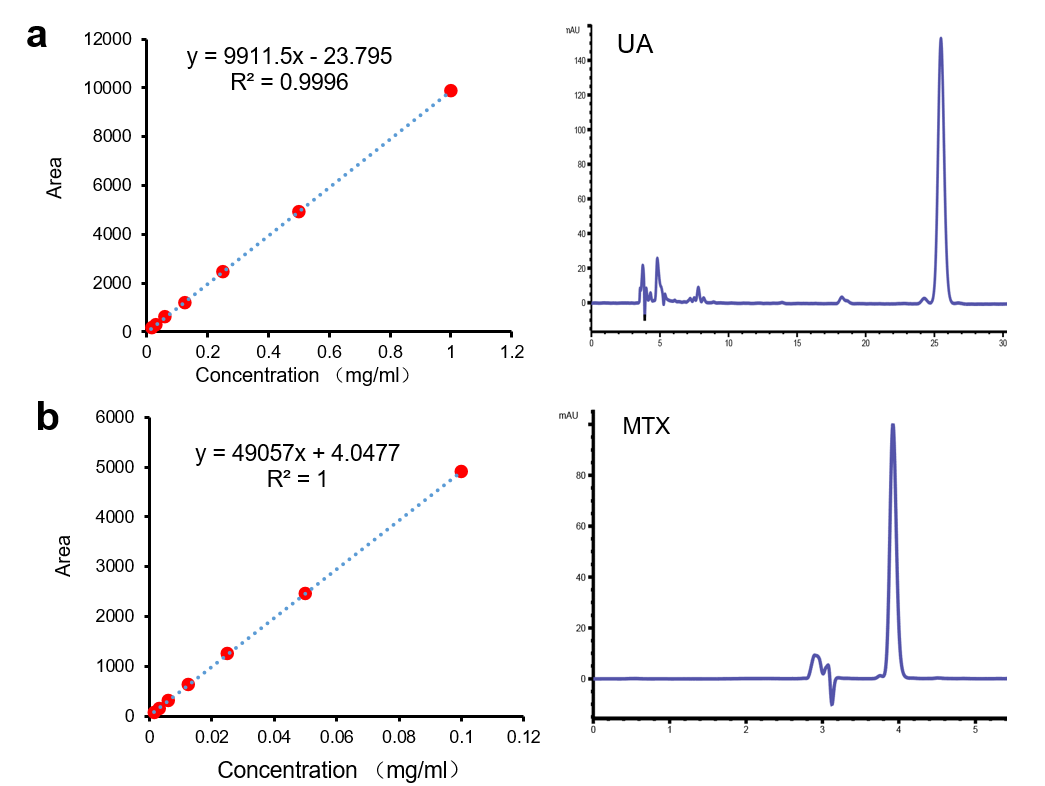


**Figure S1.** (a) High Performance Liquid Chromatography and standard curve of UA; (b) High Performance Liquid Chromatography and standard curve of MTX.


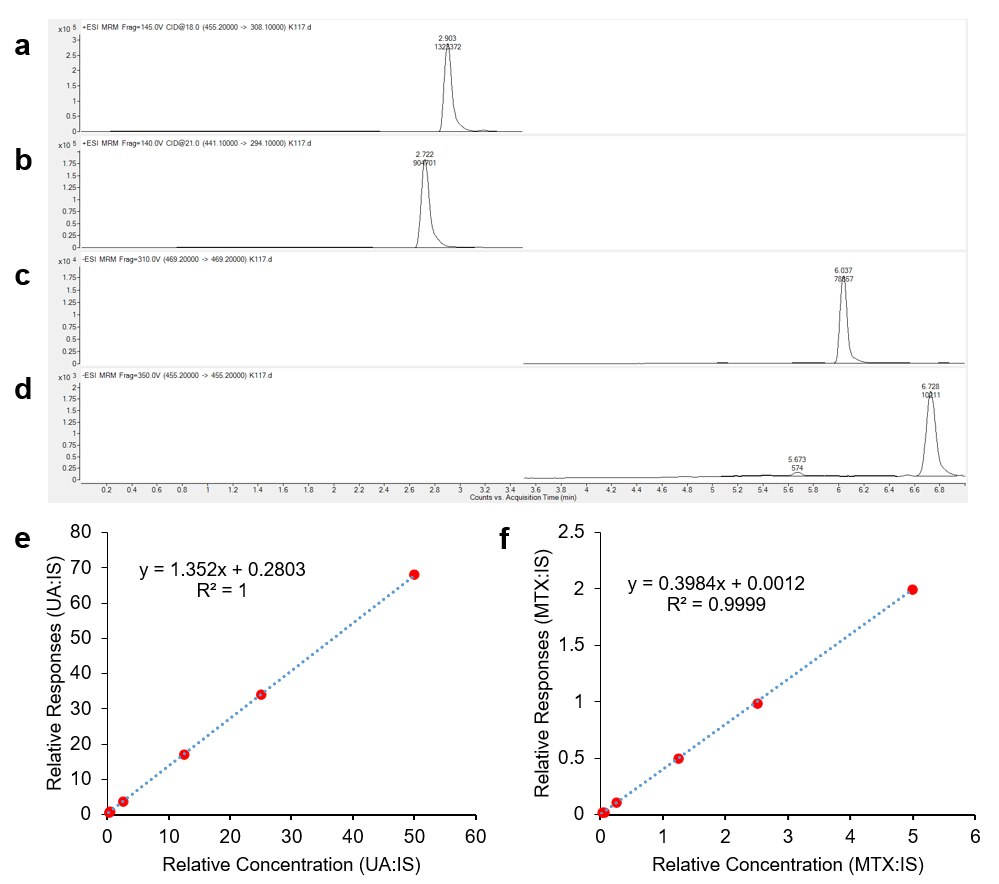


**Figure S2.** (a) UPLC-MS/MS Chromatography of MTX; (b) UPLC-MS/MS Chromatography of aminopterinum (internal standard, IS); (c) UPLC-MS/MS Chromatography of UA; (d) UPLC-MS/MS Chromatography of enoxolone (internal standard, IS); (e) Standard curve of UA; (f) Standard curve of MTX.


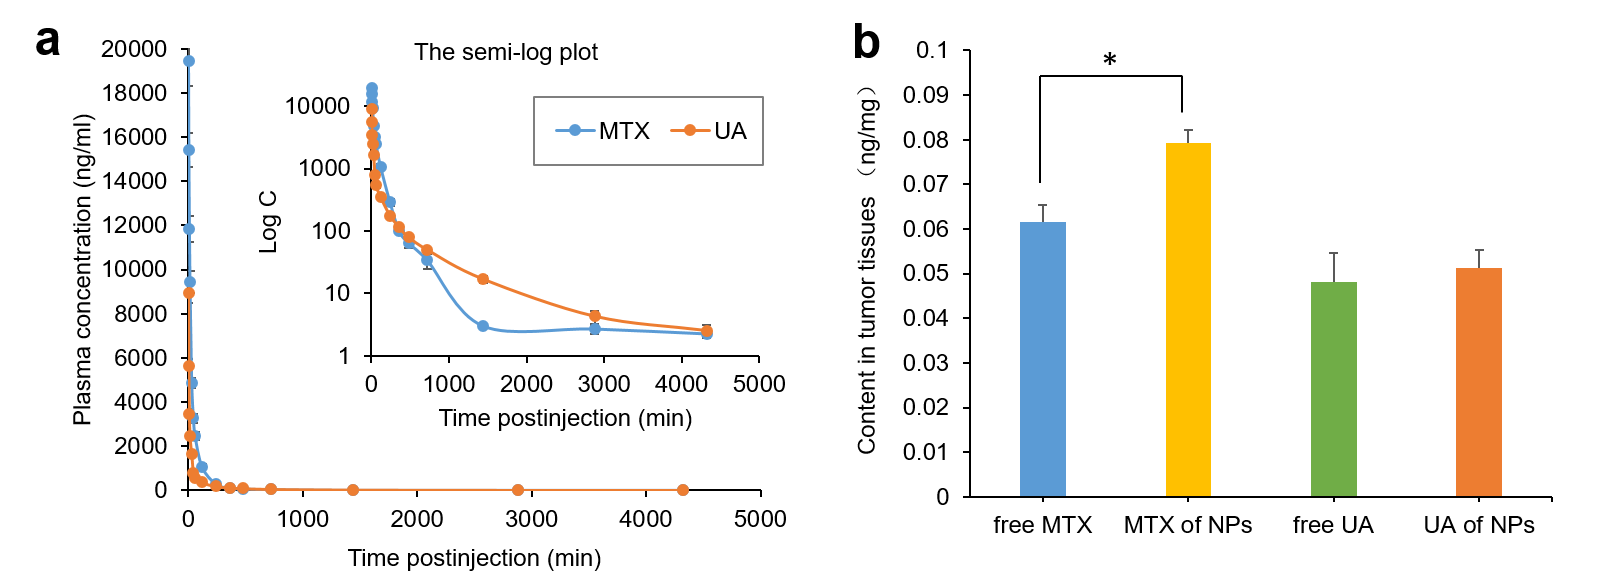


**Figure S3.** (a) Mean concentration–time curve of MTX and UA in plasma after intravenous injection of MTX-UA NPs in rats (n=5); (b) Mean drug concentration in tumors (n=5). * *p* < 0.05.

**Table S2.** Pharmacokinetic parameters of UA-MTX NPs

| Parameters | MTX-UA NPs | |
| --- | --- | --- |
| MTX | UA |
| AUC(mg/L*h) | 40859.49±15821.83 | 17314.17±1179.09 |
| MRT0-t (h) | 1.75±0.40 | 5.41±3.29 |
| t1/2z (h) | 15.60±4.23 | 9.89±7.76 |
| CLz (L/min/kg) | 0.033±0.014 | 0.07±0.005 |
| Vz (L/kg) | 44.44±17.04 | 58.27±45.43 |
| Cmax (mg/L) | 19.44±6.33 | 8.94±2.69 |


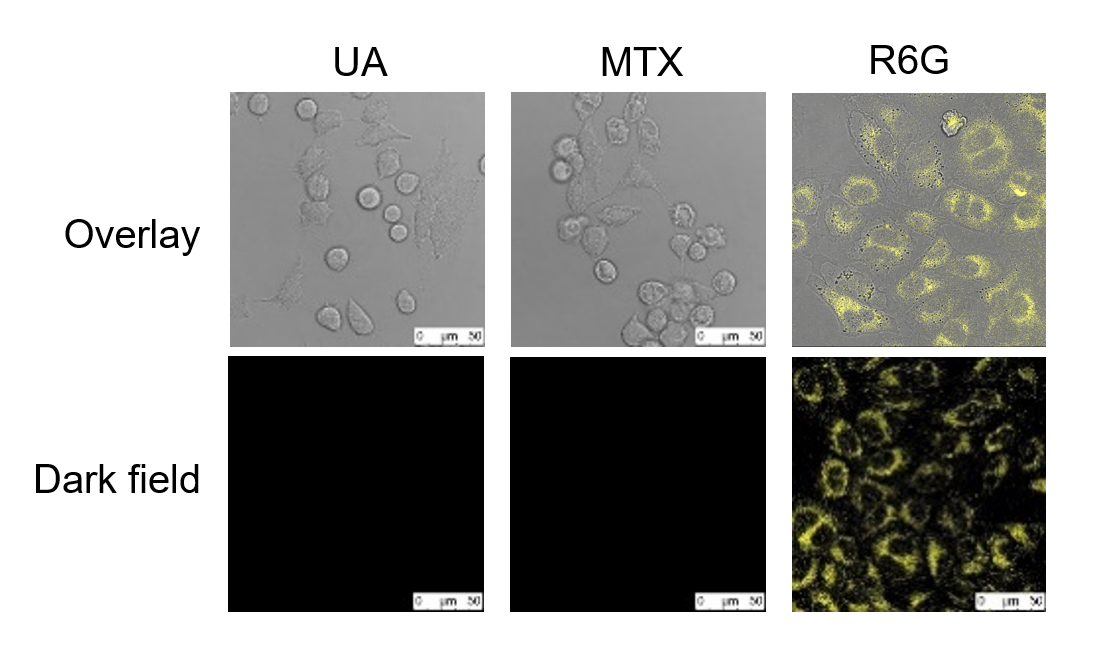


**Figure S4.** CLSM images of incubation with UA,MTX and Rhodamine 6G.

**Table S3**. The PDI and Zeta potential of UA-MTX-R6G NPs and UA-R6G NPs

| **NPs** | **UAa (**mL**)** | **MTXb (**mL**)** | **R6Gc (**mL**)** | **H2O**  **(**mL**)** | **Size (nm)** | **PDI** |
| --- | --- | --- | --- | --- | --- | --- |
| UA-MTX-R6G NPs | 0.4 | 0.5 | 0.05 | 1.5 | 147.9 | 0.169 |
| UA-R6G NPs | 0.4 | 0 | 0.05 | 2 | 148.6 | 0.174 |

a The concentration of UA is 5 mM.

b The concentration of MTX is 1 mM.

c The concentration of R6G is 0.5 mM.
